# Supplementary material for: Occurrence and fate of androgens, estrogens, glucocorticoids and progestagens in two different types of municipal wastewater treatment plants
Source: Royal Society of Chemistry journal article supplement (doi:10.1039/c1em10783f), 2011-11-17
Supplement: c1em10783f.pdf [file c1em10783f.pdf]

**Occurrence and fate of androgens, estrogens, glucocorticoids, and progestagens  
in two different types of municipal wastewater treatment plants**

*Shan Liu, Guang-Guo Ying\*, Jian-Liang Zhao, Li-Jun Zhou, Bin Yang, Zhi-Feng Chen,  
Hua-Jie Lai*

*State Key Laboratory of Organic Geochemistry, Guangzhou Institute of Geochemistry,  
Chinese Academy of Sciences, Guangzhou 510640, China*

Corresponding author. Phone/fax: +86 20 85290200.

Email address: [guangguo.ying@gmail.com](mailto:guangguo.ying@gmail.com); [guang-guo.ying@gig.ac.cn](mailto:guang-guo.ying@gig.ac.cn) (GG Ying)

## Chemicals and materials

High purity standards of 28 natural and synthetic steroids were purchased from Dr. Ehrenstorfer GmbH (Germany), Supelco (USA), Riedel-de Haën (RDH, Germany), Sigma-Aldrich (USA), Cambridge Isotope Laboratories Incorporation (Massachusetts, USA), CDN Isotopes (Quebec, Canada), TCR (North York, Canada), Cerilliant (USA), ACROS and Sigma (St. Louis, MO, USA). These steroids include 14 androgens: androsta-1,4-diene-3,17-dione (ADD), 4-androstene-3,17-dione (AED), androsterone (ADR), 17 $\alpha$ -boldenone (17 $\alpha$ -BOL), 17 $\beta$ -boldenone (17 $\beta$ -BOL), 5 $\alpha$ -dihydrotestosterone (5 $\alpha$ -DHT), epi-androsterone (EADR), 4-hydroxy-androst-4-ene-17-dione (4-OHA), methyl testosterone (MT), 19-nortestosterone (19-NT), testosterone (T), 17 $\alpha$ -trenbolone (17 $\alpha$ -TBL), 17 $\beta$ -trenbolone (17 $\beta$ -TBL), and stanozolol (S); 4 estrogens: diethylstilbestrol (DES), 17 $\beta$ -estradiol (E2), estrone (E1), and 17 $\alpha$ -ethynyl estradiol (EE2); 5 glucocorticoids: cortisol (CRL), cortisone (CRN), dexamethasone (DEX), prednisone (PRE), and prednisolone (PREL); and 5 progestagens: ethynyl testosterone (ET), medroxyprogesterone (MP), 19-norethindrone (19-NTD), norgestrel (NGT), and progesterone (P); and their corresponding internal standards testosterone-16,16,17-d<sub>3</sub> (T-d<sub>3</sub>), stanozolol-d<sub>3</sub> (S-d<sub>3</sub>), 17 $\beta$ -estradiol-2,4,16,16-d<sub>4</sub> (E2-d<sub>4</sub>), estrone-2,4,16,16-d<sub>4</sub> (E1-d<sub>4</sub>), cortisol-d<sub>2</sub> (CRL-d<sub>2</sub>), progesterone-d<sub>9</sub> (P-d<sub>9</sub>).

Methanol, ethyl acetate and hexane were all HPLC grade purchased from Merck Corporation (Shanghai, China) or CNW Technologies (Dusseldorf, Germany). Formic acid was obtained from Tedia company (Tedia, USA). The cartridges used for solid

phase extraction (SPE) were Oasis HLB cartridges (N-vinylpyrrolidone-m-divinylbenzene copolymer, 500 mg, 6 mL) that were obtained from Waters Corporation (Milford, MA, USA). Glass fiber filters (GF/F, pore size 0.7  $\mu\text{m}$ ) were supplied by Whatman (Maidstone, England) and pyrolyzed at 450 °C for 4 h prior to use. Neutral silica gel (100-200 mesh, Qingdao, China) was Soxhlet extracted with dichloromethane for 48 h and baked at 160 °C for 16h prior to use. Anhydrous sodium sulfate was baked at 450 °C and stored in a sealed desiccator. HPLC grade water was obtained from a Milli-Q water purification system (Millipore, Watford). Stock solutions of chemicals (100 mg/L) were prepared in methanol and stored at -18 °C for later use. Working standard solutions were prepared weekly. All glassware was hand-washed with detergent and tap water, rinsed with Milli-Q water, and baked at 450 °C for at least 4 h before use.

## **Sample extraction and analysis**

### *Sample extraction and cleanup*

The water samples and sludge samples were analyzed according to our previous method.<sup>1</sup> Solid phase extraction (SPE) was used to extract water samples. One liter of water samples was filtered through glass fiber filters (Whatman GF/F, 0.7  $\mu\text{m}$  effective pore size, UK). Exactly 100  $\mu\text{L}$  each of 1 mg/L of E1-d4, E2-d4, T-d3, S-d3, CRL-d2 and P-d9 was added to each sample as the internal standards. Solid phase extraction cartridges (Oasis HLB, 6 mL and 500 mg each) were preconditioned each with 10 mL of methanol followed by 10 mL of HPLC grade water. The filtered water

samples passed through the SPE cartridges at a flow rate of 5 to 10 mL/min. The sample bottle was rinsed twice with two aliquots of 50 mL of 5% (v/v) methanol in HPLC grade water, which passed through the cartridge. Then the cartridges were dried under the vacuum for 2 h, and the target compounds were eluted from the cartridges using 12 mL of ethyl acetate. The extracts were dried and re-dissolved in 1 mL of methanol. Each final extract was then filtered through a 0.22 µm membrane filter into a 2 mL amber glass vial for further cleanup.

Ultrasonic extraction was used to extract sludge samples. Three parallel freeze-dried sludge samples (0.5 g), spiked with 100 ng of E1-d4, E2-d4, T-d3, S-d3, CRL-d2 and P-d9 as internal standards, were put into 30 mL glass centrifuge tubes. To volatilize the solvent from the sludge samples, the tubes were put into the fume hood for 4 h with foil loosely capped, manually mixed well, and then kept in 4 °C overnight. The sludge sample was extracted with 10 mL of ethyl acetate in an ultrasonic bath for 15 min and then centrifuged at 3500 rpm for 10 min. The supernatant was transferred into 100 mL pear-shaped flask by a glass pipette. The extraction process was repeated twice using 10 mL and 5 mL of the above extraction solution. Then all 25 mL extract from each sample was combined, evaporated to dryness via rotary evaporation, redissolved in 1 mL of methanol, and passed through 0.22 µm filter for further cleanup.

In this study, self-made silica gel cartridge (18 cm×1 cm i.d.), which had been extracted by dichloromethane for 48 h, was used for further cleanup. The glass cartridge (self-made) was filled with glass wool (CNW), 1.0 g silica gel and 0.5 cm of

anhydrous sodium sulfate from bottom to top. Each extract (240  $\mu\text{L}$ ) was added to the silica cartridge, which was preconditioned with 5 mL of methanol, 5 mL of ethyl acetate/methanol (90:10, v/v), and 5 mL of hexane. After the cartridge was rinsed with 6 mL of hexane, the target compounds were eluted with 6 mL of ethyl acetate/methanol (90:10, v/v). The eluate was then dried and reconstituted in 240  $\mu\text{L}$ . Before analysis, 100  $\mu\text{L}$  of that concentrated solution was dried and reconstituted in a buffer for the RRLC/MSMS analysis. For negative mode, the buffer was methanol/water (50:50, v/v), whereas for positive mode, the buffer was methanol/water-0.01% formic acid (60:40, v/v).

#### *Instrumental analysis*

The target compounds were analyzed by RRLC-MS/MS with electrospray ionization (ESI). Liquid chromatography was performed on an Agilent 1200 series RRLC system (Agilent Technologies) equipped with a degasser, a binary pump, an auto sampler and a column oven. The chromatographic separation was performed on an Agilent Zorbax SB-C18 (100 mm  $\times$  3 mm, 1.8  $\mu\text{m}$ ) column with its corresponding pre-column filter (2.1 mm, 0.2  $\mu\text{m}$ ). The column oven temperature was set to 40  $^{\circ}\text{C}$  and the injection volume was 10  $\mu\text{L}$ . Two gradient elution programs were applied for two groups of steroids (Group I: estrogens; Group II: androgens, progestagens, and glucocorticoids), with a flow rate at 0.3 mL/min (Group I) and 0.35 mL/min (Group II), respectively. Mass spectrometry was performed using an Agilent 6460 Triple Quadrupole detector which was operated with ESI in both negative and positive

modes (Agilent Corporation, USA). The quantitative analysis of the target compounds was performed in multiple reaction monitoring (MRM) mode. Nitrogen gas was used as the drying and collision gas. Multiple reaction monitoring (MRM) parameters for the target compounds and internal standards are listed in [Table S2](#).

Estrogens (Group I) were analyzed in the ESI (-) mode. The mobile phase used in the analysis was (A) Milli-Q water and (B) acetonitrile, with a linear gradient from 50% to 100% B in 10 min, post time 5 min. The MS operating conditions were set as follows: gas temperature, 350 °C; gas flow, 8 mL/min; nebulizer pressure, 50 psi; sheath gas flow, 12 L/min; sheath gas temperature, 350 °C; nozzle voltage, -2000 V; and capillary voltage, 3500 V.

Androgens, progestagens, and glucocorticoids (Group II) were analyzed in the ESI (+) mode. The mobile phase was: (A) water containing formic acid (0.01%, v/v) and (B) methanol, with the following elution program: from 60% to 80% B in 15 min, then from 80% to 60% B in 0.5 min, post time 5 min. The MS operating conditions were set as follows: gas temperature, 350 °C; gas flow, 3 mL/min; nebulizer pressure, 40 psi; sheath gas flow, 12 L/min; sheath gas temperature, 350 °C; nozzle voltage, 2000 V; and capillary voltage, 3500 V.

Calibration curves were constructed for androgens from 1.0 to 2000 µg/L (standard concentration levels at 1.0, 5.0, 10, 50, 100, 200 µg/L or 10, 50, 100, 200, 1000, 2000 µg/L according to the detected concentrations level) and for other targets from 1.0 to 200 µg/L (standard concentration levels at 1, 5, 10, 50, 100 and 200 µg/L), and excellent linearity was achieved in these concentration ranges with the correlation

coefficients higher than 0.99 for all validation batches.

Using the optimized extraction and instrumental methods, good recoveries were achieved for all target compounds in matrix spiked samples of surface water, wastewater and sludge samples (Table S3). The limit of detection (LOD) and limit of quantitation (LOQ) for each target compound were calculated based on the signal-to-noise ratio (SNR) near the target peak. LOD is defined as three times of SNR, and LOQ is ten times of SNR. The LOQs for the target analytes in the influent, effluent, surface water, and freeze-dried sludge samples were 0.05-4.8, 0.02-1.63, 0.03-0.80 ng/L, and 0.3-6.9 ng/g, respectively (Table S3). Both intra- and inter-day precision of the RRLC-MS/MS instrument were examined. For the intra-day precision, a standard solution (10 µg/L of each compound) was injected successively seven times. The R.S.D. was in the 0.6-11.6% range for all compounds. For the inter-day experiment, five of the standard solutions (10 µg/L of each compound) were performed on five different days over one month interval. In this case the R.S.D. was less than 14.1%.

### **Mass Balance and aqueous phase removal rate calculation**

Mass balance is an instructive approach to estimate mass flows of a target analyte entering and leaving a wastewater treatment plant both in treated wastewater and sludge forms. Considering the low volatilization, the losses of steroids into the air are negligible in this study. The basic mass balance equation is shown in the following equation:<sup>2</sup>

$$M_{\text{Inf}} = M_{\text{Eff}} + M_{\text{Sludge}} + M_{\text{Loss}} \quad (\text{Eq-1})$$

where  $M_{\text{Inf}}$  and  $M_{\text{Eff}}$ , are the mass load of a target analyte in influent and final effluent (g/d), respectively;  $M_{\text{Sludge}}$  represents the mass load in dewatered sludge (g/d);  $M_{\text{Loss}}$  stands for the loss mass of the analyte during the whole WWTP treatment which is mainly caused by the sum contribution of sorption and degradation in each process.

According to equation (Eq-1),

$$M_{\text{Loss}}\% = (M_{\text{Inf}} - M_{\text{Eff}} - M_{\text{Sludge}}) / M_{\text{Inf}} \times 100\% \quad (\text{Eq-2})$$

And the mass percentages for each compound in final effluent and dewatered sludge samples were calculated by  $M_{\text{Eff}}/M_{\text{Inf}}\%$  and  $M_{\text{Slu}}/M_{\text{Inf}}\%$ , respectively.

Aqueous phase removal rate is employed to estimate quantitatively the removal efficiency of a target analyte in each treatment process of WWTP and can be expressed by the following equation:

$$R_{\text{Aqueous}}\% = (M_{\text{Inf-i}} - M_{\text{Eff-i}}) / M_{\text{Inf}} \times 100\% \quad (\text{Eq-3})$$

where  $M_{\text{Inf-i}}$  and  $M_{\text{Eff-i}}$  are the mass load of a target analyte in influent and effluent (g/d) of the selected unit treatment process (i), respectively;  $M_{\text{Inf}}$  represents the mass load in influent (g/d);  $R_{\text{Aqueous}}\%$  stands for the removal rate of the target analyte in selected unit treatment process in aqueous phase.

In each unit treatment process, the total mass load of each target analyte can be calculated using the following equation:

$$M_{\text{Total}} = C_{\text{Dissolved}} \times Q / 10^6 + C_{\text{Adsorbed}} \times Q \times C_{\text{TSS}} / 10^9 \quad (\text{Eq-4})$$

Where  $M_{\text{Total}}$  (g/d) is the total mass of a target analyte in the unit treatment process;  $C_{\text{Dissolved}}$  (ng/L) and  $C_{\text{Adsorbed}}$  (ng/g) represent the concentrations of the target analyte



in the aqueous and suspended solids phase;  $Q$  ( $\text{m}^3/\text{d}$ ) stands for the water flow;  $C_{\text{TSS}}$  ( $\text{mg}/\text{L}$ ) is the concentration of total suspended solids. When the actual concentration is below the limit of detection (LOD),  $\text{LOD}/\sqrt{2}$  is used for calculation.

### **Estimation of steroids in influent based on serving population**

The primary source of steroids in influent of municipal WWTPs is from human excretion urine and feces. Based on published data, the concentration of steroids in feces is far less than that in urine and could be negligible.<sup>3-5</sup> Thus, the daily excretion mass of urine can be used to estimate the source of steroids in WWTP influents. According to previous studies on excretion of steroids from human, data of estrogens and androgens are easily available from the literature<sup>3,5</sup> to predict the human daily excretion of estrogens and androgens. Considering the detected concentrations and potencies in environment and excretion data availability,<sup>3</sup> ten natural steroids (five androgens (4-Androstene-3,17-dione, androsterone,  $5\alpha$ -dihydrotestosterone, epi-androsterone, and testosterone), three estrogens ( $17\beta$ -estradiol, estrone and estriol), one glucocorticoid (cortisol) and one progestagen (progesterone)) are selected as the representatives to estimate the mass loading into the WWTPs.

As for those steroids such as testosterone and progesterone with only concentration data available, the daily excretion can be calculated by 24-h urine volume. The normal range for 24-h urine volume is 800-2000 mL (with a normal fluid intake of about 2 liters per day). Here, geometric mean 1265 mL for urine volume per day was used for calculation. Since the concentration of progesterone in pregnant women urine is not

available to our investigation, it was estimated by estrogen concentration level in the same stage of pregnancy.<sup>5,6</sup> There is a significant variation for the quantity of each steroid excreted by different sections of the population. Therefore, in this study, five sections (pregnant females, menstrual females, menopausal females, females taking hormone replacement therapy (HRT) and males) were taken into account (Table S4).

The estimated concentrations of a selected steroid in influent by serving population can be calculated using the following equation:

$$C_i = (\sum P_i \times P_T \times U_i) / Q \quad (\text{Eq-5})$$

Where  $C_i$  (ng/L) is the estimated concentration of a target analyte (i) in influent;  $P_i$  is the percentage of people in different section,  $P_T$  stands for the total serving population of the selected WWTP;  $U_i$  ( $\mu\text{g}/\text{d}$ ) represents the mass of the target analyte excretion from urine of different section people each day;  $Q$  ( $\text{m}^3/\text{d}$ ) stands for the water flow.

### References

1. S. Liu, G.-G. Ying, J.-L. Zhao, F. Chen, B. Yang, L.-J. Zhou and H.-j. Lai, *Journal of Chromatography A*, 2011, 1218, 1367-1378.
2. J. Heidler and R. U. Halden, *Environmental Science & Technology*, 2008, 42, 6324-6332.
3. Z. H. Liu, Y. Kanjo and S. Mizutani, *Sci. Total Environ.*, 2009, 407, 4975-4985.
4. J.-P. Besse and J. Garric, *Environmental Pollution*, 2009, 157, 3485-3494.
5. A. C. Johnson and R. J. Williams, *Environmental Science & Technology*, 2004, 38, 3649-3658.
6. K. K. Leslie, L. Reznikov, F. R. Simon, P. V. Fennessey, H. Reyes and J. Ribalta, *Obstet. Gynecol.*, 2000, 95, 372-376.
7. Guangdong Statistical Yearbook in 2009.  
([http://www.gdstats.gov.cn/tjnj/table/4/c4\\_1.htm](http://www.gdstats.gov.cn/tjnj/table/4/c4_1.htm)).
8. R. Gadzala-Kopciuch, J. Ricanyová, B. Buszewski, *Journal of*

Chromatography B, 2009, 877, 1177-1184.

Table S1 Parameters of Plant A and Plant B.

| Process             | Water flow<br>m <sup>3</sup> /d | TSS<br>mg/L | COD<br>mg/L | BOD <sub>5</sub><br>mg/L | TP<br>mg/L | NH <sub>4</sub> -N<br>mg/L | pH  | Conductivity<br>ms/cm |
|---------------------|---------------------------------|-------------|-------------|--------------------------|------------|----------------------------|-----|-----------------------|
| <b>Plant A</b>      |                                 |             |             |                          |            |                            |     |                       |
| Influent            | 74400                           | 150         | 170-180     | 70-80                    |            | 16                         | 8.1 |                       |
| Grit chamber        | 74400                           |             |             |                          |            |                            |     |                       |
| Anoxic              | 74400                           | 3000        |             |                          |            |                            |     |                       |
| Anaerobic           | 74400                           | 3000        |             |                          |            |                            |     |                       |
| Aerobic             | 74400                           | 3000        |             |                          |            |                            |     |                       |
| Final effluent      | 19680                           | 10          | 20          | 15                       |            | 3                          | 6.7 | 60                    |
| Return sludge       | 67200                           | 10000       |             |                          |            |                            |     |                       |
| <b>Plant B</b>      |                                 |             |             |                          |            |                            |     |                       |
| Influent            | 96000                           | 175         | 185         | 110                      | 2.7        | 23                         |     |                       |
| Grit chamber        | 96000                           | 3000        |             |                          |            |                            |     |                       |
| Oxidation ditch     | 96000                           | 3000        |             |                          |            |                            |     |                       |
| Secondary clarifier | 96000                           |             |             |                          |            |                            |     |                       |
| Final effluent      | 170800                          | 16          | 22          | 10                       | 0.8        | 35                         |     |                       |
| Return sludge       |                                 | 4000        |             |                          |            |                            |     |                       |

TSS, total suspended solids; COD, chemical oxygen demand; BOD<sub>5</sub>, 5d biochemical oxygen demand; TP, total phosphorus.

Table S2 Details of the androgens, estrogens, glucocorticoids, progestagens and their multiple reaction monitoring (MRM) parameters in RRLC-MS/MS (androgens, glucocorticoids and progestagens under positive ionization mode, estrogens under negative ionization mode) based on Liu et al. (2011).<sup>1</sup>

| Compound                         | Abbreviation     | Supplier         | M. W. <sup>b</sup> | CAS        | R.T. <sup>c</sup> | Precursor ion | Product ions | Fragmentor (volts) | Collision energy (volts) |
|----------------------------------|------------------|------------------|--------------------|------------|-------------------|---------------|--------------|--------------------|--------------------------|
| <b>Androgens</b>                 |                  |                  |                    |            |                   |               |              |                    |                          |
| Androsta-1,4-diene-3,17-dione    | ADD              | TCR              | 284.4              | 897-06-3   | 5.438             | 285.2         | 121.1        | 105                | 21                       |
|                                  |                  |                  |                    |            |                   |               | 77.1         | 105                | 61                       |
| 4-Androstene-3,17-dione          | AED              | Dr. Ehrenstorfer | 286.4              | 63-05-8    | 7.129             | 287.2         | 109.1        | 135                | 25                       |
|                                  |                  |                  |                    |            |                   |               | 97.1         | 135                | 21                       |
| Androsterone                     | ADR              | Dr. Ehrenstorfer | 290.4              | 53-41-8    | 12.114            | 291.2         | 273.2        | 90                 | 5                        |
|                                  |                  |                  |                    |            |                   |               | 255.2        | 90                 | 13                       |
| 17 $\alpha$ -boldenone           | 17 $\alpha$ -BOL | CERILLIANT       | 286.4              | 27833-18-7 | 7.601             | 287.2         | 269.2        | 85                 | 5                        |
|                                  |                  |                  |                    |            |                   |               | 121.1        | 85                 | 25                       |
| 17 $\beta$ -boldenone            | 17 $\beta$ -BOL  | Dr. Ehrenstorfer | 286.4              | 846-48-0   | 6.956             | 287.2         | 135.1        | 90                 | 9                        |
|                                  |                  |                  |                    |            |                   |               | 121.1        | 90                 | 21                       |
| 5 $\alpha$ -dihydrotestosterone  | 5 $\alpha$ -DHT  | Dr. Ehrenstorfer | 290.4              | 521-18-6   | 10.458            | 291.2         | 273.2        | 115                | 9                        |
|                                  |                  |                  |                    |            |                   |               | 255.2        | 115                | 13                       |
| Epi-androsterone                 | EADR             | ACROS            | 290.4              | 481-29-8   | 9.820             | 291.2         | 273.2        | 90                 | 5                        |
|                                  |                  |                  |                    |            |                   |               | 175.2        | 90                 | 9                        |
| 4-Hydroxy-androst-4-ene-17-dione | 4-OHA            | TRC              | 302.4              | 566-48-3   | 10.256            | 303.2         | 257.2        | 110                | 13                       |
|                                  |                  |                  |                    |            |                   |               | 55.1         | 110                | 53                       |
| Methyl testosterone              | MT               | Dr. Ehrenstorfer | 302.4              | 58-18-4    | 10.253            | 303.2         | 109.1        | 140                | 29                       |
|                                  |                  |                  |                    |            |                   |               | 97.1         | 140                | 25                       |
| 19-Nortestosterone               | 19-NT            | Dr. Ehrenstorfer | 274.4              | 434-22-0   | 7.238             | 275.2         | 109.1        | 130                | 45                       |
|                                  |                  |                  |                    |            |                   |               | 55           | 130                | 61                       |
| Testosterone                     | T                | Dr. Ehrenstorfer | 288.4              | 58-22-0    | 8.565             | 289.2         | 109.1        | 135                | 25                       |

|                                               |                  |                  |       |            |        |       |       |     |     |
|-----------------------------------------------|------------------|------------------|-------|------------|--------|-------|-------|-----|-----|
|                                               |                  |                  |       |            |        |       | 97.1  | 135 | 21  |
| Testosterone-16,16,17-d3 (I.S. <sup>a</sup> ) | T-d3             | CERILLIANT       | 291.4 | 77546-39-5 | 8.501  | 292.2 | 109.1 | 135 | 25  |
|                                               |                  |                  |       |            |        |       | 97.1  | 135 | 29  |
| 17 $\alpha$ -trenbolone                       | 17 $\alpha$ -TBL | CERILLIANT       | 270.4 | 80657-17-6 | 6.405  | 271.2 | 253.2 | 150 | 20  |
|                                               |                  |                  |       |            |        |       | 115   | 150 | 96  |
| 17 $\beta$ -trenbolone                        | 17 $\beta$ -TBL  | Dr. Ehrenstorfer | 270.4 | 10161-33-8 | 6.411  | 271.2 | 165.1 | 140 | 69  |
|                                               |                  |                  |       |            |        |       | 128   | 140 | 69  |
| Stanozolol                                    | S                | Dr. Ehrenstorfer | 328.5 | 10418-03-8 | 13.259 | 329.3 | 81.1  | 215 | 73  |
|                                               |                  |                  |       |            |        |       | 54.1  | 215 | 100 |
| Stanozolol-d3 (I.S.)                          | S-d3             | CERILLIANT       | 331.5 | 88247-87-4 | 13.202 | 332.3 | 81.1  | 220 | 53  |
|                                               |                  |                  |       |            |        |       | 54.1  | 220 | 89  |
| <b>Estrogens</b>                              |                  |                  |       |            |        |       |       |     |     |
| Diethylstilbestrol                            | DES              | Riedel-de Haen   | 268.4 | 56-53-1    | 4.738  | 267   | 251.1 | 163 | 17  |
|                                               |                  |                  |       |            |        |       | 237.1 | 163 | 21  |
| 17 $\beta$ -estradiol                         | E2               | Dr. Ehrenstorfer | 272.4 | 50-28-2    | 3.719  | 271   | 183.0 | 204 | 33  |
|                                               |                  |                  |       |            |        |       | 145.0 | 204 | 30  |
| 17 $\beta$ -estradiol-2,4,16,16-d4 (I.S.)     | E2-d4            | CDN              | 276.4 | 66789-03-5 | 3.713  | 275   | 187.0 | 219 | 25  |
| Estrone                                       | E1               | Riedel-de Haen   | 270.4 | 53-16-7    | 4.643  | 269   | 145.1 | 148 | 33  |
|                                               |                  |                  |       |            |        |       | 143.1 | 148 | 57  |
| Estrone-2,4,16,16-d4 (I.S.)                   | E1-d4            | Cambridge        | 274.4 | 53866-34-5 | 4.638  | 273   | 147.2 | 168 | 37  |
| 17 $\alpha$ -ethynyl estradiol                | EE2              | Dr. Ehrenstorfer | 296.4 | 57-63-6    | 4.170  | 295   | 159.0 | 170 | 34  |
|                                               |                  |                  |       |            |        |       | 145.0 | 170 | 38  |
| <b>Glucocorticoids</b>                        |                  |                  |       |            |        |       |       |     |     |
| Cortisol                                      | CRL              | Dr. Ehrenstorfer | 362.5 | 50-23-7    | 3.701  | 363.2 | 121   | 170 | 24  |
|                                               |                  |                  |       |            |        |       | 91    | 170 | 72  |
| Cortisol-d2 (I.S.)                            | CRL-d2           | CDN isotopes     | 364.4 | 79037-25-5 | 3.695  | 365.2 | 122   | 165 | 24  |

|                        |        |                  |       |            |        |       |       |     |    |
|------------------------|--------|------------------|-------|------------|--------|-------|-------|-----|----|
|                        |        |                  |       |            |        |       | 91.1  | 165 | 76 |
| Cortisone              | CRN    | Sigma            | 360.5 | 53-06-5    | 3.228  | 361.2 | 163   | 155 | 20 |
|                        |        |                  |       |            |        |       | 105   | 155 | 48 |
| Dexamethasone          | DEX    | Dr. Ehrenstorfer | 392.5 | 50-02-2    | 4.760  | 393.2 | 147   | 125 | 28 |
|                        |        |                  |       |            |        |       | 91    | 125 | 72 |
| Prednisone             | PRE    | Dr. Ehrenstorfer | 358.4 | 53-03-2    | 3.131  | 359.2 | 147   | 120 | 28 |
|                        |        |                  |       |            |        |       | 91    | 120 | 72 |
| Prednisolone           | PREL   | Dr. Ehrenstorfer | 360.4 | 50-24-8    | 3.729  | 361.2 | 343.1 | 135 | 4  |
|                        |        |                  |       |            |        |       | 147   | 135 | 20 |
| <b>Progestagens</b>    |        |                  |       |            |        |       |       |     |    |
| Ethynyl testosterone   | ET     | Dr. Ehrenstorfer | 312.4 | 434-03-7   | 8.514  | 313.2 | 109.1 | 135 | 25 |
|                        |        |                  |       |            |        |       | 97.1  | 135 | 21 |
| Medroxyprogesterone    | MP     | Dr. Ehrenstorfer | 344.5 | 520-85-4   | 10.640 | 345.2 | 123.1 | 145 | 25 |
|                        |        |                  |       |            |        |       | 97.1  | 145 | 29 |
| 19-Norethindrone       | 19-NTD | TRC              | 298.4 | 68-22-4    | 7.260  | 299.2 | 109.1 | 130 | 29 |
|                        |        |                  |       |            |        |       | 77.1  | 130 | 73 |
| Norgestrel             | NGT    | Sigma            | 312.4 | 6533-00-2  | 9.579  | 313.2 | 91.1  | 135 | 61 |
|                        |        |                  |       |            |        |       | 77.1  | 135 | 77 |
| Progesterone           | P      | Dr. Ehrenstorfer | 314.4 | 57-83-0    | 12.715 | 315.2 | 109.1 | 130 | 25 |
|                        |        |                  |       |            |        |       | 97.1  | 130 | 21 |
| Progesterone-d9 (I.S.) | P-d9   | TCR              | 323.5 | 15775-74-3 | 12.527 | 324.3 | 113.1 | 125 | 29 |
|                        |        |                  |       |            |        |       | 100.1 | 125 | 25 |

<sup>a</sup> I.S., internal standard; <sup>b</sup> molecular weight; <sup>c</sup> retention time (min).

Table S3 Recoveries and detection limits of steroids in influent, effluent and sludge samples by RRLC-MS/MS based on Liu et al. (2011).

| Compound                         | Effluent  |                            |                            | Influent  |               |               | Surface water |               |               | Sludge    |               |               |
|----------------------------------|-----------|----------------------------|----------------------------|-----------|---------------|---------------|---------------|---------------|---------------|-----------|---------------|---------------|
|                                  | 100 ng/L  | LOD <sup>a</sup><br>(ng/L) | LOQ <sup>b</sup><br>(ng/L) | 100 ng/L  | LOD<br>(ng/L) | LOQ<br>(ng/L) | 100 ng/L      | LOD<br>(ng/L) | LOQ<br>(ng/L) | 100 ng/g  | LOD<br>(ng/g) | LOQ<br>(ng/g) |
| <b>Androgens</b>                 |           |                            |                            |           |               |               |               |               |               |           |               |               |
| Androsta-1,4-diene-3,17-dione    | 111±1.2   | 0.08                       | 0.28                       | 112±5.1   | 0.17          | 0.55          | 111±4.8       | 0.05          | 0.16          | 112±14.6  | 0.30          | 0.99          |
| 4-Androstene-3,17-dione          | 112±1.2   | 0.11                       | 0.37                       | 107±2.8   | 0.28          | 0.95          | 110±2.9       | 0.05          | 0.16          | 87.2±6.5  | 0.47          | 1.56          |
| Androsterone                     | 80.6±4.7  | 0.40                       | 1.33                       | 80.8±14.0 | 0.82          | 2.72          | 113±11.0      | 0.04          | 0.14          | 82.6±5.8  | 0.70          | 2.32          |
| 17 $\alpha$ -boldenone           | 113±3.9   | 0.11                       | 0.38                       | 99.2±6.2  | 0.14          | 0.47          | 111±3.3       | 0.05          | 0.18          | 121±9.7   | 0.41          | 1.36          |
| 17 $\beta$ -boldenone            | 114±1.2   | 0.11                       | 0.38                       | 113±1.9   | 0.18          | 0.60          | 107±2.8       | 0.06          | 0.19          | 101±6.2   | 0.63          | 2.10          |
| 5 $\alpha$ -dihydrotestosterone  | 123±2.8   | 0.39                       | 1.30                       | 130±2.8   | 0.90          | 3.01          | 143±3.4       | 0.04          | 0.13          | 122±10.5  | 0.70          | 2.32          |
| Epi-androsterone                 | 103±5.8   | 0.26                       | 0.87                       | 133±33.8  | 0.27          | 0.91          | 119±11.4      | 0.04          | 0.14          | 62.6±15.0 | 0.83          | 2.76          |
| 4-Hydroxy-androst-4-ene-17-dione | 104±3.4   | 0.17                       | 0.56                       | 92.1±3.2  | 0.22          | 0.72          | 96.7±3.1      | 0.08          | 0.25          | 94.0±7.3  | 0.25          | 0.83          |
| Methyl testosterone              | 94.2±2.8  | 0.07                       | 0.24                       | 88.5±2.4  | 0.24          | 0.79          | 99.2±1.8      | 0.01          | 0.04          | 77.2±3.1  | 0.37          | 1.24          |
| 19-Nortestosterone               | 103±4.0   | 0.31                       | 1.03                       | 90.8±4.0  | 0.31          | 1.03          | 101±3.2       | 0.10          | 0.33          | 76.5±4.3  | 0.58          | 1.95          |
| Testosterone                     | 103±1.7   | 0.11                       | 0.37                       | 105±2.6   | 0.26          | 0.88          | 103±1.8       | 0.05          | 0.18          | 98.9±1.5  | 0.46          | 1.52          |
| 17 $\alpha$ -trenbolone          | 77.7±2.0  | 0.09                       | 0.31                       | 67.2±2.8  | 0.16          | 0.54          | 93.3±4.8      | 0.11          | 0.36          | 100±5.4   | 0.62          | 2.07          |
| 17 $\beta$ -trenbolone           | 109±0.5   | 0.15                       | 0.50                       | 63.2±5.3  | 0.33          | 1.09          | 94.2±3.9      | 0.20          | 0.68          | 91.6±3.6  | 0.64          | 2.14          |
| Stanozolol                       | 99.3±0.6  | 0.01                       | 0.02                       | 113±2.0   | 0.02          | 0.05          | 102±1.0       | 0.01          | 0.03          | 100±2.1   | 0.08          | 0.27          |
| <b>Estrogens</b>                 |           |                            |                            |           |               |               |               |               |               |           |               |               |
| Diethylstilbestrol               | 60.7±3.4  | 0.16                       | 0.52                       | 44.0±2.9  | 0.63          | 2.09          | 96.2±6.2      | 0.14          | 0.46          | 76.3±5.7  | 0.59          | 1.96          |
| 17 $\beta$ -estradiol            | 106±11.7  | 0.29                       | 0.95                       | 139±31.5  | 1.44          | 4.81          | 107±7.6       | 0.24          | 0.80          | 94.9±2.3  | 0.98          | 3.26          |
| Estrone                          | 89.1±15.4 | 0.05                       | 0.17                       | 104±7.4   | 0.20          | 0.68          | 113±3.8       | 0.09          | 0.30          | 103±4.0   | 0.10          | 0.34          |
| 17 $\alpha$ -ethynyl estradiol   | 94.3±5.7  | 0.49                       | 1.63                       | 94.5±7.9  | 0.72          | 2.38          | 96.3±3.3      | 0.19          | 0.64          | 69.1±7.9  | 0.80          | 2.66          |
| <b>Glucocorticoids</b>           |           |                            |                            |           |               |               |               |               |               |           |               |               |
| Cortisol                         | 102±2.3   | 0.14                       | 0.47                       | 105±7.8   | 0.41          | 1.37          | 97.2±3.0      | 0.06          | 0.20          | 100±9.4   | 1.66          | 5.54          |



|                      |          |      |      |          |      |      |          |      |      |          |      |      |
|----------------------|----------|------|------|----------|------|------|----------|------|------|----------|------|------|
| Cortisone            | 78.4±1.5 | 0.12 | 0.38 | 133±5.4  | 0.27 | 0.89 | 90.6±1.3 | 0.07 | 0.24 | 70.3±4.7 | 0.58 | 1.95 |
| Dexamethasone        | 122±4.3  | 0.25 | 0.83 | 200±11.2 | 0.45 | 1.50 | 116±2.6  | 0.04 | 0.13 | 116±4.0  | 2.06 | 6.86 |
| Prednisolone         | 114±4.1  | 0.29 | 0.97 | 100±1.1  | 0.39 | 1.31 | 112±6.6  | 0.03 | 0.09 | 65.6±3.7 | 1.48 | 4.93 |
| Prednisone           | 99.1±2.5 | 0.10 | 0.32 | 172±4.9  | 0.35 | 1.18 | 100±4.2  | 0.05 | 0.18 | 107±6.6  | 0.84 | 2.79 |
| <b>Progestagens</b>  |          |      |      |          |      |      |          |      |      |          |      |      |
| Ethynyl testosterone | 93.9±6.8 | 0.09 | 0.30 | 116±5.4  | 0.18 | 0.59 | 99.5±2.7 | 0.04 | 0.13 | 138±7.6  | 0.54 | 1.81 |
| Medroxyprogesterone  | 117±7.5  | 0.04 | 0.15 | 133±5.2  | 0.12 | 0.40 | 110±2.1  | 0.04 | 0.13 | 137±4.2  | 0.38 | 1.28 |
| 19-Norethindrone     | 94.9±6.5 | 0.21 | 0.71 | 103±4.6  | 0.42 | 1.40 | 93.3±1.5 | 0.02 | 0.08 | 105±6.6  | 1.92 | 6.39 |
| Norgestrel           | 100±6.3  | 0.03 | 0.10 | 115±5.6  | 0.31 | 1.03 | 96.8±2.8 | 0.04 | 0.12 | 109±2.9  | 0.90 | 2.99 |
| Progesterone         | 98.6±0.3 | 0.08 | 0.27 | 110±2.2  | 0.09 | 0.29 | 102±1.0  | 0.05 | 0.17 | 113±2.4  | 0.42 | 1.39 |

<sup>a</sup> LOD, limit of detection; <sup>b</sup> LOQ, limit of quantitation.

Table S4 Masses of selected steroids in human urine per day ( $\mu\text{g/d}$ ).

|                                                           | Males             | Females           |                   |                   |                  |
|-----------------------------------------------------------|-------------------|-------------------|-------------------|-------------------|------------------|
|                                                           |                   | Menstrual         | Menopausal        | Menopausal on HRT | Pregnant         |
| Population %                                              | 50                | 35.6 <sup>a</sup> | 13.4 <sup>a</sup> | 2.0 <sup>b</sup>  | 1.0 <sup>a</sup> |
| <b>Estrogens (<math>\mu\text{g/d}</math>)</b>             |                   |                   |                   |                   |                  |
| 17 $\beta$ -estradiol <sup>b</sup>                        | 1.8               | 3.2               | 1.0               | 56.0              | 393              |
| Estriol <sup>c</sup>                                      | 1.5               | 8.1               | 2.8               |                   | 24078            |
| Estrone <sup>b</sup>                                      | 2.6               | 11.7              | 1.8               | 28.4              | 550              |
| <b>Androgens<sup>c</sup> (<math>\mu\text{g/d}</math>)</b> |                   |                   |                   |                   |                  |
| 4-Androstene-3,17-dione                                   | 3.7               |                   |                   |                   |                  |
| Androsterone                                              | 3340              |                   |                   | 1570              |                  |
| 5 $\alpha$ -dihydrotestosterone                           | 14.1              |                   |                   |                   |                  |
| Epi-androsterone                                          | 229               |                   |                   |                   |                  |
| Testosterone                                              | 56.7              |                   |                   | 6.8               |                  |
| <b>Progestagens (<math>\mu\text{g/d}</math>)</b>          |                   |                   |                   |                   |                  |
| Progesterone                                              | 16.1 <sup>d</sup> | 127 <sup>d</sup>  | 37.5 <sup>d</sup> | 214 <sup>d</sup>  | 260 <sup>e</sup> |
| <b>Glucocorticoids (<math>\mu\text{g/d}</math>)</b>       |                   |                   |                   |                   |                  |
| Cortisol <sup>c</sup>                                     | 251               |                   |                   | 167               |                  |

<sup>a</sup> Estimated by Guangdong Statistical Yearbook in 2009 ([http://www.gdstats.gov.cn/tjnj/table/4/c4\\_1.htm](http://www.gdstats.gov.cn/tjnj/table/4/c4_1.htm)); <sup>b</sup> Johnson, A.C., Williams, R.J. (2004); <sup>c</sup> Referred by Liu et al.(2009); <sup>d</sup> Estimated based on the data from Gadzala-Kopciuch et al. (2009); <sup>e</sup> Estimated by Gadzala-Kopciuch et al. (2009) and Leslie et al. (2000).

Table S5 Concentrations (dissolved ng/L; adsorbed ng/g) of steroids in different treatment stages of Plant A.

| Compound                      |           | Influent              | Grit chamber effluent | Anoxic effluent   | Anaerobic effluent | Aerobic effluent | Final effluent | Return sludge | Dewatered sludge |
|-------------------------------|-----------|-----------------------|-----------------------|-------------------|--------------------|------------------|----------------|---------------|------------------|
| <b>Androgens</b>              |           |                       |                       |                   |                    |                  |                |               |                  |
| Androsta-1,4-diene-3,17-dione | dissolved | 121±23.6 <sup>a</sup> | 100±0.5               | 4.2±0.1           | 3.9±0.2            | 3.3±0.1          | 3.5±0.2        |               |                  |
|                               | adsorbed  |                       |                       | 20.5±0.5          | 15.3±1.2           | 130±5.5          |                | 17.7±1.1      | 11.6±2.7         |
| 4-Androstene-3,17-dione       | dissolved | 31.1±5.1              | 33.0±0.5              | 4.7±0.3           | 4.9±0.2            | 4.7±0.0          | 5.5±0.3        |               |                  |
|                               | adsorbed  |                       |                       | 16.0±1.5          | 13.4±0.8           | 34.3±0.4         |                | 14.3±0.4      | 7.9±0.1          |
| Androsterone                  | dissolved | 229±10.6              | 260±9.7               | N.D. <sup>b</sup> | N.D.               | N.D.             | N.D.           |               |                  |
|                               | adsorbed  |                       |                       | N.D.              | N.D.               | N.D.             |                | N.D.          | N.D.             |
| 17β-boldenone                 | dissolved | 18.8±3.6              | 17.3±0.7              | 1.5±0.0           | 1.6±0.2            | 1.6±0.2          | 1.6±0.0        |               |                  |
|                               | adsorbed  |                       |                       | 5.2±0.3           | N.D.               | 8.7±1.2          |                | N.D.          | N.D.             |
| 5α-dihydrotestosterone        | dissolved | N.D.                  | N.D.                  | N.D.              | 22.1±0.7           | N.D.             | N.D.           |               |                  |
|                               | adsorbed  |                       |                       | 295±7.3           | 527±23.1           | 252±24.7         |                | 276±50.4      | 460±4.4          |
| Epi-androsterone              | dissolved | 1368±283              | 1430±38.1             | 18.4±1.6          | 9.0±1.2            | 7.8±0.1          | N.D.           |               |                  |
|                               | adsorbed  |                       |                       | 324±14.6          | 615±76.7           | 307±3.6          |                | 345±5.3       | 431±39.7         |
| Methyl testosterone           | dissolved | N.D.                  | N.D.                  | N.D.              | N.D.               | N.D.             | N.D.           |               |                  |
|                               | adsorbed  |                       |                       | 4.4±0.1           | 6.6±1.6            | 4.9±0.6          |                | 6.5±0.1       | 5.7±0.6          |
| Testosterone                  | dissolved | 8.9±1.0               | 10.5±0.2              | 1.5±0.2           | 1.4±0.1            | 1.3±0.1          | 1.5±0.2        |               |                  |
|                               | adsorbed  |                       |                       | 5.1±0.4           | 5.3±0.5            | 7.3±0.2          |                | 5.3±0.3       | N.D.             |
| 17α-trenbolone                | dissolved | N.D.                  | N.D.                  | N.D.              | N.D.               | N.D.             | N.D.           |               |                  |
|                               | adsorbed  |                       |                       | 8.6±1.6           | 12.1±1.0           | 5.1±0.7          |                | 6.5±0.5       | 6.6±0.8          |
| Stanozolol                    | dissolved | 1.3±0.0               | 1.2±0.0               | 1.2±0.0           | 1.2±0.0            | 1.2±0.0          | 1.2±0.0        |               |                  |
|                               | adsorbed  |                       |                       | N.D.              | N.D.               | N.D.             |                | N.D.          | N.D.             |
| <b>Estrogens</b>              |           |                       |                       |                   |                    |                  |                |               |                  |

|                        |           |                              |                 |                    |                 |                |                |                |                 |
|------------------------|-----------|------------------------------|-----------------|--------------------|-----------------|----------------|----------------|----------------|-----------------|
| 17 $\beta$ -estradiol  | dissolved | 23.9 $\pm$ 9.6               | 21.9 $\pm$ 10.6 | 9.5 $\pm$ 2.4      | 10.1 $\pm$ 1.8  | 16.0 $\pm$ 1.7 | 4.8 $\pm$ 1.5  |                |                 |
|                        | adsorbed  |                              |                 | 61.2 $\pm$ 11.6    | 67.8 $\pm$ 16.8 | 11.4 $\pm$ 0.3 |                | 90.7 $\pm$ 5.9 | 48.9 $\pm$ 11.4 |
| Estrone                | dissolved | 36.3 $\pm$ 11.6              | 43.8 $\pm$ 2.9  | 15.2 $\pm$ 1.9     | 9.0 $\pm$ 3.3   | 9.0 $\pm$ 0.0  | 8.7 $\pm$ 0.3  |                |                 |
|                        | adsorbed  |                              |                 | 10.5 $\pm$ 1.0     | 11.6 $\pm$ 0.1  | 1.3 $\pm$ 0.1  |                | 3.2 $\pm$ 0.2  | 8.9 $\pm$ 3.5   |
| <b>Glucocorticoids</b> |           |                              |                 |                    |                 |                |                |                |                 |
| Cortisol               | dissolved | 130 $\pm$ 3.1                | 156 $\pm$ 11.8  | 10.1 $\pm$ 2.0     | 15.7 $\pm$ 1.6  | 9.8 $\pm$ 2.6  | 4.5 $\pm$ 0.7  |                |                 |
|                        | adsorbed  |                              |                 | N.D.               | N.D.            | N.D.           |                | N.D.           | N.D.            |
| Cortisone              | dissolved | 61.5 $\pm$ 20.7 <sup>b</sup> | 57.3 $\pm$ 2.8  | 3.3 $\pm$ 1.5      | 2.9 $\pm$ 1.1   | 1.8 $\pm$ 0.0  | 1.8 $\pm$ 0.1  |                |                 |
|                        | adsorbed  |                              |                 | N.D. <sup>c</sup>  | N.D.            | N.D.           |                | N.D.           | N.D.            |
| Prednisolone           | dissolved | N.D.                         | N.D.            | N.D.               | N.D.            | N.D.           | N.D.           |                |                 |
|                        | adsorbed  |                              |                 | N.D.               | N.D.            | 6.0 $\pm$ 0.5  |                | N.D.           | N.D.            |
| <b>Progestagens</b>    |           |                              |                 |                    |                 |                |                |                |                 |
| Medroxyprogesterone    | dissolved | N.D.                         | N.D.            | N.D.               | N.D.            | N.D.           | N.D.           |                |                 |
|                        | adsorbed  |                              |                 | 2.1 $\pm$ 0.1      | N.D.            | N.D.           |                | N.D.           | N.D.            |
| Norgestrel             | dissolved | 28.3 $\pm$ 7.2               | 27.6 $\pm$ 8.0  | 15.1 $\pm$ 2.6     | 12.3 $\pm$ 0.9  | 9.7 $\pm$ 0.4  | 11.0 $\pm$ 0.9 |                |                 |
|                        | adsorbed  |                              |                 | < LOD <sup>c</sup> | N.D.            | N.D.           |                | N.D.           | N.D.            |
| Progesterone           | dissolved | 12.2 $\pm$ 1.9               | 15.0 $\pm$ 0.0  | 2.7 $\pm$ 0.2      | 1.4 $\pm$ 0.3   | 0.9 $\pm$ 0.1  | 1.1 $\pm$ 0.1  |                |                 |
|                        | adsorbed  |                              |                 | 19.7 $\pm$ 1.1     | 13.8 $\pm$ 0.2  | 96.3 $\pm$ 3.3 |                | N.D.           | N.D.            |

<sup>a</sup> mean  $\pm$  standard deviation (n=3, replicate samples at the same time); <sup>b</sup> N.D.: not detected; <sup>c</sup> <LOD: below the limit of detection.

Table S6 Mass flux (g/d) of steroids in different treatment stages of Plant A.

| Compound                        |           | Influent | Grit chamber effluent | Anoxic effluent | Anaerobic effluent | Aerobic effluent | Final effluent | Return sludge | Dewatered sludge | $M_{\text{Eff}}/M_{\text{Inf}}\%$ | $M_{\text{Slu}}/M_{\text{Inf}}\%$ | Loss% |
|---------------------------------|-----------|----------|-----------------------|-----------------|--------------------|------------------|----------------|---------------|------------------|-----------------------------------|-----------------------------------|-------|
| <b>Androgens</b>                |           |          |                       |                 |                    |                  |                |               |                  |                                   |                                   |       |
| Androsta-1,4-diene-3,17-dione   | dissolved | 9.00     | 7.44                  | 0.31            | 0.29               | 0.25             | 0.07           |               |                  |                                   |                                   |       |
|                                 | adsorbed  |          |                       | 4.58            | 3.41               | 29.02            |                | 13.17         | 0.08             |                                   |                                   |       |
|                                 | total     | 9.00     | 7.44                  | 4.89            | 3.71               | 29.26            | 0.07           | 13.17         | 0.08             | 0.8                               | 0.9                               | 98.3  |
| 4-Androstene-3,17-dione         | dissolved | 2.31     | 2.46                  | 0.35            | 0.36               | 0.35             | 0.11           |               |                  |                                   |                                   |       |
|                                 | adsorbed  |          |                       | 3.57            | 2.99               | 7.66             |                | 10.64         | 0.06             |                                   |                                   |       |
|                                 | total     | 2.31     | 2.46                  | 3.92            | 3.36               | 8.01             | 0.11           | 10.64         | 0.06             | 4.8                               | 2.6                               | 92.6  |
| Androsterone                    | dissolved | 17.04    | 19.34                 | 0.00            | 0.00               | 0.00             | 0.00           |               |                  |                                   |                                   |       |
|                                 | adsorbed  |          |                       | 0.00            | 0.00               | 0.00             |                | 0.00          | 0.00             |                                   |                                   |       |
|                                 | total     | 17.04    | 19.34                 | 0.00            | 0.00               | 0.00             | 0.00           | 0.00          | 0.00             | 0.0                               | 0.0                               | 100   |
| 17 $\beta$ -boldenone           | dissolved | 1.40     | 1.29                  | 0.11            | 0.12               | 0.12             | 0.03           |               |                  |                                   |                                   |       |
|                                 | adsorbed  |          |                       | 1.16            | 0.00               | 1.94             |                | 0.00          | 0.00             |                                   |                                   |       |
|                                 | total     | 1.40     | 1.29                  | 1.27            | 0.12               | 2.06             | 0.03           | 0.00          | 0.00             | 2.1                               | 0.0                               | 97.9  |
| 5 $\alpha$ -dihydrotestosterone | dissolved | 0.00     | 0.00                  | 0.00            | 1.64               | 0.00             | 0.00           |               |                  |                                   |                                   |       |
|                                 | adsorbed  |          |                       | 65.84           | 117.63             | 56.25            |                | 205.34        | 3.22             |                                   |                                   |       |
|                                 | total     | 0.00     | 0.00                  | 65.84           | 119.27             | 56.25            | 0.00           | 205.34        | 3.22             | N.A. <sup>a</sup>                 | N.A.                              | N.A.  |
| Epi-androsterone                | dissolved | 101.79   | 106.39                | 1.37            | 0.67               | 0.58             | 0.00           |               |                  |                                   |                                   |       |
|                                 | adsorbed  |          |                       | 72.32           | 137.27             | 68.52            |                | 256.68        | 3.02             |                                   |                                   |       |
|                                 | total     | 101.79   | 106.39                | 73.69           | 137.94             | 69.10            | 0.00           | 256.68        | 3.02             | 0.0                               | 3.0                               | 97.0  |
| Methyl testosterone             | dissolved | 0.00     | 0.00                  | 0.00            | 0.00               | 0.00             | 0.00           |               |                  |                                   |                                   |       |
|                                 | adsorbed  |          |                       | 0.98            | 1.47               | 1.09             |                | 4.84          | 0.04             |                                   |                                   |       |
|                                 | total     | 0.00     | 0.00                  | 0.98            | 1.47               | 1.09             | 0.00           | 4.84          | 0.04             | N.A.                              | N.A.                              | N.A.  |
| Testosterone                    | dissolved | 0.66     | 0.78                  | 0.11            | 0.10               | 0.10             | 0.03           |               |                  |                                   |                                   |       |

|                         |           |      |       |       |       |      |      |       |      |      |      |      |
|-------------------------|-----------|------|-------|-------|-------|------|------|-------|------|------|------|------|
|                         | adsorbed  |      |       | 1.14  | 1.18  | 1.63 |      | 3.94  | 0.00 |      |      |      |
|                         | total     | 0.66 | 0.78  | 1.25  | 1.29  | 1.73 | 0.03 | 3.94  | 0.00 | 4.5  | 0.0  | 95.5 |
| 17 $\alpha$ -trenbolone | dissolved | 0.00 | 0.00  | 0.00  | 0.00  | 0.00 | 0.00 |       |      |      |      |      |
|                         | adsorbed  |      |       | 1.92  | 2.70  | 1.14 |      | 4.84  | 0.05 |      |      |      |
|                         | total     | 0.00 | 0.00  | 1.92  | 2.70  | 1.14 | 0.00 | 4.84  | 0.05 | N.A. | N.A. | N.A. |
| Stanozolol              | dissolved | 0.10 | 0.09  | 0.09  | 0.09  | 0.09 | 0.02 |       |      |      |      |      |
|                         | adsorbed  |      |       | 0.00  | 0.00  | 0.00 |      | 0.00  | 0.00 |      |      |      |
|                         | total     | 0.10 | 0.09  | 0.09  | 0.09  | 0.09 | 0.02 | 0.00  | 0.00 | 20.0 | 0.0  | 80.0 |
| <b>Estrogens</b>        |           |      |       |       |       |      |      |       |      |      |      |      |
| 17 $\beta$ -estradiol   | dissolved | 1.78 | 1.63  | 0.71  | 0.75  | 1.19 | 0.09 |       |      |      |      |      |
|                         | adsorbed  |      |       | 13.65 | 15.14 | 2.55 |      | 67.49 | 0.34 |      |      |      |
|                         | total     | 1.78 | 1.63  | 14.36 | 15.89 | 3.74 | 0.09 | 67.49 | 0.34 | 5.1  | 19.1 | 75.8 |
| Estrone                 | dissolved | 2.70 | 3.26  | 1.13  | 0.67  | 0.67 | 0.17 |       |      |      |      |      |
|                         | adsorbed  |      |       | 2.33  | 2.58  | 0.28 |      | 2.40  | 0.06 |      |      |      |
|                         | total     | 2.70 | 3.26  | 3.46  | 3.25  | 0.95 | 0.17 | 2.40  | 0.06 | 6.3  | 2.2  | 91.5 |
| <b>Glucocorticoids</b>  |           |      |       |       |       |      |      |       |      |      |      |      |
| Cortisol                | dissolved | 9.67 | 11.61 | 0.75  | 1.17  | 0.73 | 0.09 |       |      |      |      |      |
|                         | adsorbed  |      |       | 0.00  | 0.00  | 0.00 |      | 0.00  | 0.00 |      |      |      |
|                         | total     | 9.67 | 11.61 | 0.75  | 1.17  | 0.73 | 0.09 | 0.00  | 0.00 | 0.9  | 0.0  | 99.1 |
| Cortisone               | dissolved | 4.58 | 4.26  | 0.25  | 0.22  | 0.13 | 0.04 |       |      |      |      |      |
|                         | adsorbed  |      |       | 0.00  | 0.00  | 0.00 |      | 0.00  | 0.00 |      |      |      |
|                         | total     | 4.58 | 4.26  | 0.25  | 0.22  | 0.13 | 0.04 | 0.00  | 0.00 | 0.9  | 0.0  | 99.1 |
| Prednisolone            | dissolved | 0.00 | 0.00  | 0.00  | 0.00  | 0.00 | 0.00 |       |      |      |      |      |
|                         | adsorbed  |      |       | 0.00  | 0.00  | 1.34 |      | 0.00  | 0.00 |      |      |      |
|                         | total     | 0.00 | 0.00  | 0.00  | 0.00  | 1.34 | 0.00 | 0.00  | 0.00 | N.A. | N.A. | N.A. |
| <b>Progestagens</b>     |           |      |       |       |       |      |      |       |      |      |      |      |

---

|                     |           |      |      |      |      |       |      |      |      |      |      |      |
|---------------------|-----------|------|------|------|------|-------|------|------|------|------|------|------|
| Medroxyprogesterone | dissolved | 0.00 | 0.00 | 0.00 | 0.00 | 0.00  | 0.00 |      |      |      |      |      |
|                     | adsorbed  |      |      | 0.47 | 0.00 | 0.00  |      | 0.00 | 0.00 |      |      |      |
|                     | total     | 0.00 | 0.00 | 0.47 | 0.00 | 0.00  | 0.00 | 0.00 | 0.00 | N.A. | N.A. | N.A. |
| Norgestrel          | dissolved | 2.11 | 2.05 | 1.12 | 0.92 | 0.72  | 0.22 |      |      |      |      |      |
|                     | adsorbed  |      |      | 0.02 | 0.00 | 0.00  |      | 0.00 | 0.00 |      |      |      |
|                     | total     | 2.11 | 2.05 | 1.12 | 0.92 | 0.72  | 0.22 | 0.00 | 0.00 | 10.4 | 0.0  | 89.6 |
| Progesterone        | dissolved | 0.91 | 1.12 | 0.20 | 0.10 | 0.07  | 0.02 |      |      |      |      |      |
|                     | adsorbed  |      |      | 4.40 | 3.08 | 21.49 |      | 0.00 | 0.00 |      |      |      |
|                     | total     | 0.91 | 1.12 | 4.60 | 3.18 | 21.56 | 0.02 | 0.00 | 0.00 | 2.2  | 0.0  | 97.8 |

---

<sup>a</sup> not available.

Table S7 Concentrations (dissolved ng/L; adsorbed ng/g) of steroids in different treatment stages of Plant B.

| Compound                      |           | Influent             | Aerated grit<br>channel effluent | Oxidation ditch<br>effluent | Secondary clarifier<br>effluent | Final<br>effluent | Dewatered<br>sludge |
|-------------------------------|-----------|----------------------|----------------------------------|-----------------------------|---------------------------------|-------------------|---------------------|
| <b>Androgens</b>              |           |                      |                                  |                             |                                 |                   |                     |
| Androsta-1,4-diene-3,17-dione | dissolved | 248±6.7 <sup>a</sup> | 240±2.1                          | 3.5±0.9                     | 2.4±0.1                         | 2.8±0.1           |                     |
|                               | adsorbed  |                      |                                  | 9.3±0.5                     |                                 |                   | 7.9±0.0             |
| 4-Androstene-3,17-dione       | dissolved | 59.3±1.3             | 62.6±0.4                         | 3.2±0.5                     | 2.5±0.0                         | 2.8±0.0           |                     |
|                               | adsorbed  |                      |                                  | 7.7±0.2                     |                                 |                   | 6.7±0.1             |
| Androsterone                  | dissolved | 224±15.2             | 215±15.2                         | N.D. <sup>b</sup>           | N.D.                            | N.D.              |                     |
|                               | adsorbed  |                      |                                  | N.D.                        |                                 |                   | N.D.                |
| 17β-boldenone                 | dissolved | 15.9±1.2             | 15.6±1.5                         | 1.9±0.1                     | 1.8±0.5                         | 1.8±0.5           |                     |
|                               | adsorbed  |                      |                                  | N.D.                        |                                 |                   | N.D.                |
| 5α-DHT                        | dissolved | 64.4±40.9            | 86.5±25.7                        | N.D.                        | N.D.                            | 23.1±1.0          |                     |
|                               | adsorbed  |                      |                                  | 140±5.4                     |                                 |                   | 173±0.3             |
| Epi-androsterone              | dissolved | 934±61.4             | 910±27.1                         | N.D.                        | N.D.                            | 14.2±0.6          |                     |
|                               | adsorbed  |                      |                                  | 146±32.0                    |                                 |                   | 176±5.4             |
| Methyl testosterone           | dissolved | N.D.                 | N.D.                             | N.D.                        | N.D.                            | N.D.              |                     |
|                               | adsorbed  |                      |                                  | 4.6±0.2                     |                                 |                   | 4.6±0.0             |
| Testosterone                  | dissolved | 6.9±0.1              | 7.0±0.0                          | 2.3±0.1                     | 1.3±0.0                         | 1.9±0.0           |                     |
|                               | adsorbed  |                      |                                  | 4.0±0.2                     |                                 |                   | 5.5±0.1             |
| 17α-trenbolone                | dissolved | N.D.                 | N.D.                             | N.D.                        | N.D.                            | N.D.              |                     |
|                               | adsorbed  |                      |                                  | 4.2±0.3                     |                                 |                   | 3.7±0.1             |
| Stanozolol                    | dissolved | 1.2±0.0              | 1.2±0.0                          | 1.2±0.0                     | 1.2±0.0                         | 1.2±0.0           |                     |
|                               | adsorbed  |                      |                                  | N.D.                        |                                 |                   | N.D.                |
| <b>Estrogens</b>              |           |                      |                                  |                             |                                 |                   |                     |
| 17β-estradiol                 | dissolved | 12.0±2.9             | 25.3±13.1                        | 6.5±2.4                     | 9.2±3.0                         | 4.1±0.4           |                     |



|                        |           |                       |          |          |         |         |          |
|------------------------|-----------|-----------------------|----------|----------|---------|---------|----------|
|                        | adsorbed  |                       |          | 10.4±0.1 |         |         | 12.9±0.5 |
| Estrone                | dissolved | 29.5±8.2              | 22.0±1.8 | 1.6±0.1  | 1.5±0.1 | 1.5±0.1 |          |
|                        | adsorbed  |                       |          | 0.3±0.0  |         |         | 1.0±0.1  |
| <b>Glucocorticoids</b> |           |                       |          |          |         |         |          |
| Cortisol               | dissolved | 123±2.7               | 135±9.8  | N.D.     | N.D.    | N.D.    |          |
|                        | adsorbed  |                       |          | N.D.     |         |         | N.D.     |
| Cortisone              | dissolved | 48.2±1.7 <sup>b</sup> | 40.8±0.2 | N.D.     | N.D.    | N.D.    |          |
|                        | adsorbed  |                       |          | N.D.     |         |         | N.D.     |
| Prednisolone           | dissolved | N.D.                  | N.D.     | N.D.     | N.D.    | 2.2±0.1 |          |
|                        | adsorbed  |                       |          | 4.3±0.4  |         |         | 4.4±0.2  |
| <b>Progestagens</b>    |           |                       |          |          |         |         |          |
| Norgestrel             | dissolved | 35.3±2.0              | 31.5±3.7 | 5.0±1.2  | 4.2±0.6 | 5.9±0.8 |          |
|                        | adsorbed  |                       |          | N.D.     |         |         | N.D.     |
| Progesterone           | dissolved | 4.3±0.1               | 4.6±0.2  | 1.4±0.7  | 0.8±0.0 | 1.0±0.0 |          |
|                        | adsorbed  |                       |          | N.D.     |         |         | N.D.     |

<sup>a</sup> mean ± standard deviation (n=3, replicate samples at the same time); <sup>b</sup> N.D.: not detected.

Table S8 Mass flux (g/d) of steroids in different treatment stages of Plant B.

| Compound                        |           | Influent | Aerated grit channel<br>effluent | Oxidation ditch<br>effluent | Secondary clarifier<br>effluent | Final<br>effluent | Dewatered<br>sludge | $M_{\text{Eff}}/M_{\text{In}}\%$ | $M_{\text{Slu}}/M_{\text{In}}\%$ | Loss% |
|---------------------------------|-----------|----------|----------------------------------|-----------------------------|---------------------------------|-------------------|---------------------|----------------------------------|----------------------------------|-------|
| <b>Androgens</b>                |           |          |                                  |                             |                                 |                   |                     |                                  |                                  |       |
| Androsta-1,4-diene-3,17-dione   | dissolved | 23.81    | 23.04                            | 0.34                        | 0.23                            | 0.48              |                     |                                  |                                  |       |
|                                 | adsorbed  |          |                                  | 2.68                        |                                 |                   | 0.16                |                                  |                                  |       |
|                                 | total     | 23.81    | 23.04                            | 3.01                        | 0.23                            | 0.48              | 0.16                | 2.0                              | 0.7                              | 97.3  |
| 4-Androstene-3,17-dione         | dissolved | 5.69     | 6.01                             | 0.31                        | 0.24                            | 0.48              |                     |                                  |                                  |       |
|                                 | adsorbed  |          |                                  | 2.22                        |                                 |                   | 0.13                |                                  |                                  |       |
|                                 | total     | 5.69     | 6.01                             | 2.52                        | 0.24                            | 0.48              | 0.13                | 8.4                              | 2.3                              | 89.3  |
| Androsterone                    | dissolved | 21.50    | 20.64                            | 0.00                        | 0.00                            | 0.00              |                     |                                  |                                  |       |
|                                 | adsorbed  |          |                                  | 0.00                        |                                 |                   | 0.00                |                                  |                                  |       |
|                                 | total     | 21.50    | 20.64                            | 0.00                        | 0.00                            | 0.00              | 0.00                | 0.0                              | 0.0                              | 100   |
| 17 $\beta$ -boldenone           | dissolved | 1.53     | 1.50                             | 0.18                        | 0.17                            | 0.31              |                     |                                  |                                  |       |
|                                 | adsorbed  |          |                                  | 0.00                        |                                 |                   | 0.00                |                                  |                                  |       |
|                                 | total     | 1.53     | 1.50                             | 0.18                        | 0.17                            | 0.31              | 0.00                | 20.3                             | 0.0                              | 79.7  |
| 5 $\alpha$ -dihydrotestosterone | dissolved | 6.18     | 8.30                             | 0.00                        | 0.00                            | 3.95              |                     |                                  |                                  |       |
|                                 | adsorbed  |          |                                  | 40.32                       |                                 |                   | 3.46                |                                  |                                  |       |
|                                 | total     | 6.18     | 8.30                             | 40.32                       | 0.00                            | 3.95              | 3.46                | 63.9                             | 56.0                             | -19.9 |
| Epi-androsterone                | dissolved | 89.66    | 87.36                            | 0.00                        | 0.00                            | 2.43              |                     |                                  |                                  |       |
|                                 | adsorbed  |          |                                  | 42.05                       |                                 |                   | 3.52                |                                  |                                  |       |
|                                 | total     | 89.66    | 87.36                            | 42.05                       | 0.00                            | 2.43              | 3.52                | 2.7                              | 3.9                              | 93.4  |
| Methyl testosterone             | dissolved | 0.00     | 0.00                             | 0.00                        | 0.00                            | 0.00              |                     |                                  |                                  |       |
|                                 | adsorbed  |          |                                  | 1.32                        |                                 |                   | 0.09                |                                  |                                  |       |
|                                 | total     | 0.00     | 0.00                             | 1.32                        | 0.00                            | 0.00              | 0.09                | N.A.                             | N.A.                             | N.A.  |
| Testosterone                    | dissolved | 0.66     | 0.67                             | 0.22                        | 0.12                            | 0.32              |                     |                                  |                                  |       |

|                         |           |       |       |      |      |      |      |      |      |       |
|-------------------------|-----------|-------|-------|------|------|------|------|------|------|-------|
|                         | adsorbed  |       |       | 1.15 |      |      | 0.11 |      |      |       |
|                         | total     | 0.66  | 0.67  | 1.37 | 0.12 | 0.32 | 0.11 | 48.5 | 16.7 | 34.8  |
| 17 $\alpha$ -trenbolone | dissolved | 0.00  | 0.00  | 0.00 | 0.00 | 0.00 |      |      |      |       |
|                         | adsorbed  |       |       | 1.21 |      |      | 0.07 |      |      |       |
|                         | total     | 0.00  | 0.00  | 1.21 | 0.00 | 0.00 | 0.07 | N.A. | N.A. | N.A.  |
| Stanozolol              | dissolved | 0.12  | 0.12  | 0.12 | 0.12 | 0.20 |      |      |      |       |
|                         | adsorbed  |       |       | 0.00 |      |      | 0.00 |      |      |       |
|                         | total     | 0.12  | 0.12  | 0.12 | 0.12 | 0.20 | 0.00 | 167  | 0.0  | -66.7 |
| <b>Estrogens</b>        |           |       |       |      |      |      |      |      |      |       |
| 17 $\beta$ -estradiol   | dissolved | 1.15  | 2.43  | 0.62 | 0.88 | 0.70 |      |      |      |       |
|                         | adsorbed  |       |       | 3.00 |      |      | 0.26 |      |      |       |
|                         | total     | 1.15  | 2.43  | 3.62 | 0.88 | 0.70 | 0.26 | 60.9 | 22.6 | 16.5  |
| Estrone                 | dissolved | 2.83  | 2.11  | 0.15 | 0.14 | 0.26 |      |      |      |       |
|                         | adsorbed  |       |       | 0.09 |      |      | 0.02 |      |      |       |
|                         | total     | 2.83  | 2.11  | 0.24 | 0.14 | 0.26 | 0.02 | 9.2  | 0.7  | 90.1  |
| <b>Glucocorticoids</b>  |           |       |       |      |      |      |      |      |      |       |
| Cortisol                | dissolved | 11.81 | 12.96 | 0.00 | 0.00 | 0.00 |      |      |      |       |
|                         | adsorbed  |       |       | 0.00 |      |      | 0.00 |      |      |       |
|                         | total     | 11.81 | 12.96 | 0.00 | 0.00 | 0.00 | 0.00 | 0.0  | 0.0  | 100   |
| Cortisone               | dissolved | 4.63  | 3.92  | 0.00 | 0.00 | 0.00 |      |      |      |       |
|                         | adsorbed  |       |       | 0.00 |      |      | 0.00 |      |      |       |
|                         | total     | 4.63  | 3.92  | 0.00 | 0.00 | 0.00 | 0.00 | 0.0  | 0.0  | 100   |
| Prednisolone            | dissolved | 0.00  | 0.00  | 0.00 | 0.00 | 0.38 |      |      |      |       |
|                         | adsorbed  |       |       | 1.24 |      |      | 0.09 |      |      |       |
|                         | total     | 0.00  | 0.00  | 1.24 | 0.00 | 0.38 | 0.09 | N.A. | N.A. | N.A.  |
| <b>Progestagens</b>     |           |       |       |      |      |      |      |      |      |       |

|              |           |      |      |      |      |      |      |      |     |      |
|--------------|-----------|------|------|------|------|------|------|------|-----|------|
| Norgestrel   | dissolved | 3.39 | 3.02 | 0.48 | 0.40 | 1.01 |      |      |     |      |
|              | adsorbed  |      |      | 0.00 |      |      | 0.00 |      |     |      |
|              | total     | 3.39 | 3.02 | 0.48 | 0.40 | 1.01 | 0.00 | 29.8 | 0.0 | 70.2 |
| Progesterone | dissolved | 0.41 | 0.44 | 0.13 | 0.08 | 0.16 |      |      |     |      |
|              | adsorbed  |      |      | 0.00 |      |      | 0.00 |      |     |      |
|              | total     | 0.41 | 0.44 | 0.13 | 0.08 | 0.16 | 0.00 | 39.0 | 0.0 | 61.0 |

<sup>a</sup> not available.

Table S9 Percentages of selected steroids in dissolved and adsorbed phase of different stages by estimation and measurement in Plant A.

Table S10 Percentages of selected steroids in dissolved and adsorbed phase of different stages by estimation and measurement in Plant B.

Tables S9-10 listed in excel.
